# Supplementary material for: Loss of Munc18-1 long splice variant in GABAergic terminals is associated with cognitive decline and increased risk of dementia in a community sample
Source: Springer Nature journal article supplement (doi:10.1186/s13024-015-0061-4), 2015-12-01
Supplement: MOESM2 [file 9776524]

## Additional file 2

**Table S1.** Commercial and locally produced primary antibodies used in the present study.

| <i>Commercially available antibodies</i> |                                              |             |                   |                 |                    |                     |                     |                  |
|------------------------------------------|----------------------------------------------|-------------|-------------------|-----------------|--------------------|---------------------|---------------------|------------------|
| <i>Target protein</i>                    | <i>Immunogen</i>                             | <i>Host</i> | <i>Clone</i>      | <i>Subclass</i> | <i>WB dilution</i> | <i>IHC dilution</i> | <i>Catalogue no</i> | <i>Vendor</i>    |
| M18L                                     | Residues 591–603 of human M18L               | Goat        | Polyclonal        | –               | 1:2,000            | 1:500               | PAB6504             | Abnova           |
| M18S                                     | Residues 577–594 of human M18S               | Rabbit      | Polyclonal        | –               | 1:4,000            | 1:1,000             | M 2694              | Sigma            |
| FosB                                     | Internal residues mapping mouse FosB         | Rabbit      | Polyclonal        | –               | 1:1,000            | –                   | sc-48               | Santa Cruz       |
| NeuN                                     | Mouse brain nuclear extract                  | Mouse       | A60               | IgG1            | 1:1,000            | 1:500               | MAB377              | Chemicon         |
| MBP                                      | Residues 70–89 of human myelin basic protein | Mouse       | SMI-94            | IgG1            | 1:2,000            | –                   | SMI-94R             | Covance          |
| $\alpha$ -synuclein                      | Residues 15–123 of rat synuclein-1           | Mouse       | 42/ $\alpha$ -Syn | IgG1            | 1:1,000            | –                   | 610787              | BD Biosciences   |
| VGAT                                     | Residues 75–87 of rat VGAT                   | Rabbit      | Polyclonal        | –               | –                  | 1:500               | 131 002             | Synaptic Systems |
| VGAT                                     | Residues 2–115 of rat VGAT                   | GPig        | Polyclonal        | –               | –                  | 1:500               | 131 004             | Synaptic Systems |
| VGLUT1                                   | Residues 456–560 of rat VGLUT1               | Rabbit      | Polyclonal        | –               | –                  | 1:500               | 135 302             | Synaptic Systems |
| VGLUT1                                   | Residues 456–560 of rat VGLUT1               | Mouse       | 317D5             | IgG2a           | –                  | 1:500               | 135 311             | Synaptic Systems |
| $\beta$ -actin                           | Residues 2-16 of human $\beta$ -actin        | Mouse       | AC-15             | IgG1            | 1:10,000           | –                   | A1978               | Sigma            |

  

| <i>Locally produced mouse monoclonal antibodies</i> |                                      |             |              |                 |                                |                     |                  |
|-----------------------------------------------------|--------------------------------------|-------------|--------------|-----------------|--------------------------------|---------------------|------------------|
| <i>Target protein</i>                               | <i>Immunogen</i>                     | <i>Host</i> | <i>Clone</i> | <i>Subclass</i> | <i>WB dilution<sup>a</sup></i> | <i>IHC dilution</i> | <i>Reference</i> |
| Syntaxin-1                                          | Crude human brain immunoprecipitate  | Mouse       | SP7          | IgG2a           | 1:100                          | 3 $\mu$ g/ml        | [1]              |
| Syntaxin-1                                          | Crude human brain immunoprecipitate  | Mouse       | SP6          | IgG1            | 1:100                          | –                   | [1]              |
| SNAP-25                                             | Crude human brain immunoprecipitate  | Mouse       | SP12         | IgG1            | 1:100                          | –                   | [1]              |
| VAMP                                                | Crude human brain immunoprecipitate  | Mouse       | SP10         | IgM             | 1:10                           | –                   | [1]              |
| Synaptophysin                                       | Schizophrenia human brain homogenate | Mouse       | EP10         | IgG1            | 1:100                          | –                   | [2]              |

Abbreviations: GPig, Guinea pig; M18L/S, Munc18-1 long/short splice variant; MBP: myelin basic protein; NeuN, neuronal nuclear protein; SNAP-25, synaptosome-associated protein of 25 kDa; VAMP, vesicle-associated membrane protein; VGAT, vesicular GABA transporter; VGLUT1, vesicular glutamate transporter-1

<sup>a</sup>Dilutions are from hybridoma cell culture supernatants.

## References

1. Honer WG, Hu L, Davies P: **Human synaptic proteins with a heterogeneous distribution in cerebellum and visual cortex.** *Brain Res* 1993, **609**:9–20.
2. Honer WG, Kaufmann CA, Kleinman JE, Casanova MF, Davies P: **Monoclonal antibodies to study the brain in schizophrenia.** *Brain Res* 1989, **500**:379–383.
